# Supplementary material for: Quercetin metabolism by fecal microbiota from healthy elderly human subjects
Source: PLoS One. 2017 Nov 27;12(11):e0188271. doi: 10.1371/journal.pone.0188271 (PMC5703521; doi:10.1371/journal.pone.0188271)
Supplement: S1 Table — No1~No.56 indicate the volunteer number. (XLSX) [file pone.0188271.s002.xlsx]

## Sheet: FFQg
	No.1	No.2	No.3	No.4	No.5	No.6	No.7	No.8	No.9	No.10	No.11	No.12	No.13	No.14	No.15	No.16	No.17	No.18	No.19	No.20	No.21	No.22	No.23	No.24	No.25	No.26	No.27	No.28	No.29	No.30	No.31	No.32	No.33	No.34	No.35	No.36	No.37	No.38	No.39	No.40	No.41	No.42	No.43	No.44	No.45	No.46	No.47	No.48	No.49
Energy (K cal)	2380.62	1585.75	1159.07	1861.37	1433.71	1801.74	1869.97	1574.25	1814.13	2048.68	1724.76	1527.26	1327.37	1676.47	1476.52	1593.22	1458.06	1500.61	2078.56	1880.22	3649.73	1691.72	2051.26	2339.37	2176.55	1237.26	1710.03	1738.32	1788.84	2733.38	1774.28	1803.81	1762.54	2029.22	2000.79	1919.67	1665.88	2438.25	1453.8	1561.94	2243.1	2844.66	1871.64	2024.71	1880.81	1973.53	2326.77	2429.83	1978.03
Water (g/d)	1432.51	862.608	833.715	917.799	602.357	1173.8	1200.36	822.254	1030.35	1050.18	860.287	725.262	668.641	1096.58	873.964	879.011	970.347	732.13	1022.84	1034.23	2042.21	1069.86	1076.67	1380.63	1048.23	583.031	765.122	1214.91	941.455	2065.28	1086.1	782.369	969.004	949.317	1074.74	994.302	822.864	1612.69	703.201	969.001	1101.82	1595.54	873.463	1380	1032.84	1087.98	1236.87	1172.08	1122.7
Proetein (g/d)	81.9539	58.9713	38.2024	59.7711	40.6161	70.4689	52.3392	60.3682	64.5903	65.7225	60.817	58.4785	41.154	74.2392	48.5941	57.5574	48.5772	49.6487	59.6415	65.1087	77.0198	68.8564	68.7115	83.4861	75.5691	45.6167	64.3028	51.9552	63.8198	86.1207	71.4028	60.5932	69.229	70.0014	75.6716	75.342	60.8389	82.2973	45.7285	71.5125	85.1293	92.2001	67.122	76.4025	63.9052	66.23	87.362	79.2667	77.7474
Fat (g/d)	78.3973	60.1651	36.231	69.6472	41.1669	46.2205	41.2921	47.4468	49.3342	56.3538	65.1787	47.0646	26.123	43.5275	37.1983	50.7537	33.1681	43.5587	56.3646	56.4594	108.845	56.8595	69.2039	74.1203	66.2296	35.2178	58.7937	39.1761	69.8198	64.8329	48.574	60.0034	61.5169	66.9525	75.254	64.1296	51.811	64.6977	41.6985	57.1314	78.8487	102.226	69.5281	73.6684	57.7866	52.5924	82.9639	73.2739	62.2942
Carbohydrate (g/d)	247.025	185.367	174.516	249.075	220.726	209.26	231.438	223.428	276.163	282.283	214.749	212.35	228.47	250.365	213.51	214.091	241.957	222.765	335.845	273.813	467.101	221.294	264.445	325.064	317.017	181.863	226.721	239.329	228.051	343.321	263.86	250.57	234.033	267.548	237.076	255.281	237.691	279.818	221.099	181.851	292.784	315.956	240.295	258.244	239.792	305.977	297.411	361.582	257.62
Ash (g/d)	19.6838	15.2581	12.1858	16.8413	11.1689	13.2781	16.2007	15.5819	19.1113	16.6481	15.3958	17.6673	13.4038	27.8961	15.1449	12.446	12.3595	12.2878	18.2289	19.3296	25.6385	16.642	21.3062	23.5987	16.2679	15.9579	14.3705	16.8615	16.3889	27.4516	23.3276	16.204	15.9904	18.905	19.5845	20.9875	12.4482	20.3994	12.5721	18.0047	20.1659	21.1089	16.5587	21.8891	16.5652	14.1883	20.6302	22.4032	19.8145
Na (mg/d)	4849.65	3426.97	2430.74	3629.18	2736.79	2865.53	4542.05	3757.06	4461.9	4158.21	3626.24	4664.16	3528.36	7136.34	3867	2527.85	2164.11	2847.79	3940.16	4727.54	6009.49	3268.87	5358.38	5305.96	3161.16	4564.88	3261.12	4203.82	3307.76	6802.98	5761.26	4169.21	3157	4683.11	4308.39	5472.34	2501.66	5092.44	2854.21	4150.49	4538.35	4642.62	3912.9	4641.26	4018.48	2684.93	4330.73	5095.93	4578.54
K (mg/d)	2412.99	2002.95	2280.8	2548.17	1381.51	2005.08	1720.88	1902.98	2574.02	2055.34	2083.91	1830.83	1540.55	3279.94	1769.61	1949.84	2408.87	1572.22	2831.71	2468.45	3724.23	2839.57	2498.72	3109.35	2564.29	1534.16	2115.68	2022.93	2687.33	3351.72	2937.67	1919.18	2581.14	2173.24	2635.37	2471.65	2043.72	2427.07	1745.78	2496.15	2819.22	3190.12	2160.81	3271.05	2088.75	2453.92	3014.05	2859.99	2482.94
Ca (mg/d)	552.446	626.515	300.443	686.832	357.557	437.508	213.253	532.14	630.367	445.781	466.105	481.14	297.375	732.01	418.138	563.409	469.304	482.57	641.207	542.427	762.111	644.076	614.419	953.603	963.016	273.865	388.631	546.665	648.563	809.667	636.238	391.556	646.005	608.373	798.578	506.936	438.121	530.694	424.226	541.056	727.747	685.165	509.215	935.433	478.936	568.064	891.893	967.311	824.86
Mg (mg/d)	262.576	224.247	191.208	254.982	145.226	230.308	189.189	212.346	247.846	219.674	211.275	192.417	162.42	363.201	188.956	195.247	226.208	174.352	262.777	245.191	380.185	269.933	270.935	364.81	283.934	165.723	210.615	205.414	269.024	389.818	292.172	195.506	270.189	264.224	331.27	243.626	215.605	275.603	177.549	241.641	283.678	306.307	209.029	321.016	222.846	244.942	298.306	313.842	272.024
P (mg/d)	1197.98	943.808	567.518	953.383	626.39	981.996	715.704	921.193	1015.35	931.737	896.543	867.755	610.603	1220.16	738.565	869.447	770.721	753.258	1004.06	986.149	1309.59	1099.67	1055.87	1442.2	1128.85	604.938	885.912	898.593	1050.12	1398.64	1112.67	851.859	1061.64	1077.6	1184.11	1044.25	875.701	1237.04	723.987	1069.91	1283.54	1390.13	1004.18	1274.32	940.154	989.159	1425.18	1380.67	1274.86
Fe (mg/d)	6.94173	6.71114	5.99948	9.17402	4.56156	5.40315	4.77832	5.95853	7.44844	6.66376	6.50926	6.34405	4.59133	10.3836	5.45518	6.42456	6.91233	4.66234	7.12132	6.88949	9.71049	7.61694	8.01098	9.21676	13.1794	4.68606	6.08471	5.11327	7.13936	9.96727	8.87647	6.22942	8.28311	7.83358	10.9563	8.82929	6.68052	7.35979	5.46877	7.16773	8.31251	8.77774	6.81858	9.92408	6.61932	7.42149	8.68847	8.98456	7.7693
Zn (mg/d)	8.97014	6.75621	4.92517	6.86846	4.95738	6.93768	6.1376	6.8702	7.7921	6.93297	6.99066	6.73384	5.14393	8.1924	5.59616	6.28743	6.45821	5.23503	6.51485	8.05709	8.3125	8.03832	8.03504	10.001	7.82996	4.74808	6.87307	6.14527	7.18	8.92476	7.87344	7.0385	7.62316	8.4803	8.75445	8.45414	6.92305	8.8205	5.88196	8.2353	9.85254	10.2907	8.16824	8.00498	7.43335	7.46152	10.3678	9.57622	8.97748
Cu (mg/d)	0.976909	0.916456	0.813831	1.12717	0.799135	0.886933	0.775618	1.00545	1.13043	1.00455	0.970748	0.914425	0.848071	1.31492	0.809774	0.836992	1.07485	0.6709	1.21184	1.05758	1.52515	1.20763	1.2095	1.48942	1.17451	0.690476	0.877155	0.817222	1.09549	1.41896	1.21306	0.836419	1.15658	1.23871	1.43365	1.06376	1.03988	1.02924	0.849427	1.008	1.25385	1.17677	0.967428	1.15019	0.949696	1.04603	1.23891	1.34326	1.13986
Mn (mg/d)	2.32359	2.10725	2.0352	2.66127	2.04857	2.1008	2.20097	2.43249	2.68035	2.43113	2.3668	1.93941	2.18773	3.08258	2.25618	1.97501	2.93064	1.76785	3.14561	2.6533	4.21398	2.79485	2.91422	3.68271	2.81026	1.70038	2.10374	2.30751	2.64104	3.95401	2.78815	2.20583	2.66953	2.93184	3.24726	2.65421	2.60096	2.56699	2.05067	2.16368	2.86203	2.98859	2.25267	2.63419	2.1855	2.64039	3.03831	3.29608	2.71029
Iodine (μg/d)	769.002	1507.5	100.944	58.4206	144.957	1522.41	359.813	951.136	1174.13	415.664	487.044	1007.05	1403.05	6266.13	597.407	364.427	724.766	524.26	1125.18	1029.09	843.369	295.37	1037.27	1710.47	541.499	1641.37	794.612	782.383	594.637	1318.46	885.254	98.4301	291.466	1434.1	721.598	1349.2	27.6689	459.365	399.575	617.153	824.751	595.908	663.143	67.0267	284.512	447.835	524.601	725.96	913.633
Se (μg/d)	63.4822	42.5667	17.1029	41.3953	28.686	68.8747	40.0055	56.5327	53.5307	53.1005	51.5253	60.0771	29.4452	66.0295	35.2014	40.2605	35.0368	39.0268	45.3863	55.214	54.2166	48.2006	49.995	63.5659	52.3772	45.6533	49.4792	46.0768	44.4043	70.5753	68.6665	39.9603	53.2298	64.8341	49.4369	65.9786	49.6781	79.5988	38.7493	57.3137	64.5518	83.9007	57.5524	61.2898	43.9843	60.0701	70.4228	40.4036	60.5739
Cr (μg/d)	5.99365	6.05265	6.8509	10.4934	6.67961	4.30771	3.90046	6.08454	7.29383	6.33951	6.69202	5.32006	5.31326	9.99974	4.94054	5.94396	7.06072	3.59531	10.1956	5.6186	15.2264	10.433	6.21991	7.83601	8.50187	4.36808	4.73451	5.32432	6.85852	10.0592	8.10652	4.77723	7.7832	8.35984	11.9082	5.76664	5.4931	5.05854	7.46985	6.1125	8.14904	6.85113	6.39955	8.68573	5.26139	7.58717	7.70293	8.10877	7.59997
Mo (μg/d)	117.3	147.135	94.0449	143.335	110.533	105.286	107.431	154.339	167.44	103.687	96.9062	142.987	124.956	158.852	110.573	93.3823	166.266	88.4401	143.289	161.488	147.599	148.07	198.904	225.737	147.699	84.7462	99.858	123.374	99.5981	192.204	148.534	97.9588	159.422	219.945	224.708	136.131	128.838	129.335	118.413	127.674	171.371	135.624	129.083	132.635	119.508	128.438	183.543	177.464	161.226
Retinol (μg/d)	257.321	165.932	76.8944	151.599	102.649	155.388	105.378	172.13	194.68	145.102	196.393	179.12	83.6377	144.12	93.7675	176.441	92.6061	141.546	125.199	186.436	216.505	180.313	152.923	243.995	188.251	54.8244	159.91	172.806	205.841	170.843	165.537	191.014	170.843	183.741	158.206	217.156	170.179	246.361	134.693	185.912	268.546	330.826	249.085	209.81	201.911	227.781	310.684	233.125	263.418
β-Caroten (μg/d)	1704.96	1683.03	2664.79	3368.31	780.579	1726.15	1797.35	1724.62	4693.96	1308.13	2940.15	2489.48	695.852	2701.27	2005.39	2514.7	6162.44	880.858	2742.24	3664.82	1437.34	2584.25	2533.46	2454.74	4742.49	3159.64	2215.02	1213.2	3702.18	2016.47	6393.29	1392.99	4619.61	2140.84	3221.6	3848.95	2125.59	2445.29	2065.65	3530.13	2650.25	3117.41	2333.18	3048.43	1603.1	3216.07	3933.71	2456.33	1827.39
β-Caroten equivalent (μg/d)	2238.43	1935.5	3929.12	4321.64	1229.65	2115.05	2014.1	2368.22	5630.67	1730.46	3639.19	2721.95	997.049	3239.6	2619.12	3392.4	7350.05	1073.21	4230.64	4354.52	2918.99	3463.24	2915.77	3077.38	5848.02	3554.41	2839.03	1853.86	4779.64	3303.47	7613.92	1960.22	5772.99	2612.55	4007.98	5020.56	3059.92	3032.47	2694.37	4344.87	3319.21	3825.19	3108.36	3853.28	1906.52	4198.66	4876.3	3445.49	2498.76
Retinol equivalent (μg/d)	445.659	327.887	405.429	571.032	206.139	331.412	274.098	371.89	665.5	290.47	503.904	409.254	167.644	417.932	313.348	489.204	707.375	232.433	479.904	551.163	463.365	470.378	397.456	503.084	880.33	351.289	398.743	329.295	604.708	448.775	803.056	355.863	652.321	404.306	523.682	698.305	428.738	504.041	361.848	549.517	545.863	654.105	512.496	590.315	362.283	582.655	719.915	520.943	474.18
Vitamin D (μg/d)	7.75172	4.39357	1.23286	4.37546	2.32136	12.0428	4.63612	8.18402	7.25265	7.02627	6.15876	6.03649	4.63276	10.9418	3.45086	5.15745	3.63279	3.316	6.43106	7.50121	5.32218	8.54478	6.47403	8.32155	5.05349	6.79663	7.87004	4.48017	8.41685	9.64612	11.8812	3.34484	7.80244	6.69804	6.57535	10.3479	6.12145	10.499	1.47549	8.98113	9.39058	10.6532	5.02411	8.03122	5.30245	4.29433	6.24862	7.18216	8.138
αTocophrol (mg/d)	7.06217	5.69975	4.53335	7.44789	3.74512	5.39978	4.47106	5.16275	6.42786	5.83261	6.93097	5.43475	3.16342	6.78202	4.04062	4.80864	5.7942	3.82656	8.50719	6.60394	12.3893	6.17465	7.96812	8.03597	6.14284	5.38055	6.67944	4.06027	8.86404	8.10853	8.08045	5.38789	8.17346	6.93807	7.15662	7.44968	5.78371	7.04544	3.6244	6.01233	7.46373	11.1512	6.73372	8.19495	5.14013	5.78792	8.15773	6.27639	4.94859
Vitamin Ｋ (μg/d)	152.896	199.891	168.004	234.226	76.3448	120.581	118.791	154.34	238.534	128.546	196.737	175.762	93.849	290.432	147.476	145.468	292.449	102.596	151.89	227.96	161.45	191.841	249.166	246.5	234.379	175.468	141.018	100.458	198.222	252.355	297.276	127.747	284.727	205.681	320.18	206.176	150.774	161.939	122.023	217.19	216.684	251.797	182.045	249.156	164.279	172.578	253.143	224.734	179.925
Vitamin Ｂ１ (mg/d)	1.09878	0.748491	0.798352	1.03418	0.576565	0.760532	0.733557	0.693371	0.863254	0.867013	0.887545	0.651258	0.554094	0.940022	0.704433	0.888345	0.765119	0.617863	0.85419	0.884495	1.22183	1.03442	0.886433	0.971998	1.43935	0.571051	0.865236	0.673205	0.922859	1.06719	0.859819	0.91521	0.886557	0.792402	1.05717	1.16098	0.830754	0.892401	0.663048	0.978282	1.15833	1.24971	0.941358	1.11324	0.867105	0.872439	1.16882	1.0906	0.988398
Vitamin Ｂ2 (mg/d)	1.243	0.939942	0.529271	1.05926	0.619007	0.98	0.695012	0.961936	1.08586	0.967227	1.04186	0.932088	0.564823	1.13908	0.69044	0.998726	0.771187	0.819297	0.914496	1.00374	1.45363	1.06998	1.03423	1.46478	1.47725	0.579059	0.851785	0.955353	1.10492	1.33841	1.13757	0.86297	1.03363	1.036	1.13839	1.20695	0.9147	1.31704	0.737858	1.05367	1.33354	1.54664	1.09269	1.42091	1.01439	1.18098	1.46052	1.29342	1.33676
Naiacin (mg/d)	22.2874	10.7056	11.178	11.6388	6.78393	20.4499	16.6884	11.8223	12.7117	15.2752	13.4438	10.7	8.85236	16.9573	10.441	11.5449	10.0675	10.2804	11.6852	15.7439	20.1422	16.1946	14.1601	17.748	13.7667	11.3228	17.0381	11.4982	15.496	21.4561	17.1634	13.6035	13.9198	12.9541	14.0367	17.9587	12.6118	23.0208	9.08257	18.3673	18.2829	23.385	13.5596	18.6162	15.1766	13.891	16.8293	13.6399	14.7804
Naiacin equivalent (mg/d)	38.021	22.4539	18.4188	23.9459	14.7317	33.7437	26.7983	23.6627	25.4456	27.7531	25.2339	22.2372	17.0454	31.995	19.9919	22.8833	20.0115	19.859	23.3569	28.3653	35.2194	29.5081	28.0194	34.2192	31.0576	20.0617	29.1691	21.7497	27.4555	38.5114	30.8689	24.8595	27.2661	26.884	29.7295	33.1564	24.4257	38.885	17.9708	31.8639	34.4738	41.0486	26.5442	34.0002	27.4116	26.7926	33.7352	28.8585	29.8289
Vitamin Ｂ６ (mg/d)	1.57267	0.906182	1.01946	1.06754	0.616115	1.31841	1.19868	0.931469	1.14265	1.12042	1.04504	0.83291	0.745137	1.50309	0.89497	0.946461	1.05373	0.56425	1.12152	1.14586	1.79801	1.40102	1.14154	1.29102	1.03746	0.783191	1.02814	1.07021	1.24369	1.90637	1.35773	0.967899	1.22868	1.06436	1.23705	1.35646	1.0245	1.56503	0.716978	1.3525	1.37537	1.76652	1.09356	1.28214	1.13958	0.946418	1.39239	1.2198	1.17818
Vitamin Ｂ12 (μg/d)	9.3164	5.14204	1.66068	4.29217	2.41221	12.7878	5.44474	8.07474	6.62466	7.25116	5.56788	6.01415	4.81643	12.2217	3.78772	5.17321	3.68639	3.66339	6.30765	7.24181	5.66615	7.88603	6.7401	8.53011	5.63229	7.08819	8.57392	5.12703	7.12767	10.4373	10.907	3.99052	7.90139	6.99836	6.23725	10.3255	5.52435	11.2491	1.76261	9.80014	9.3195	10.4921	5.46626	7.73635	5.7049	4.12856	7.26467	6.09601	7.69703
Folic acid (μg/d)	253.4	218.528	267.623	310.317	147.757	214.056	229.981	211.104	339.634	250.081	284.978	236.184	170.157	395.184	235.85	224.35	372.348	151.254	300.284	298.474	387.838	299.217	308.018	333.379	311.523	223.961	203.046	222.478	309.579	406.826	395.113	223.13	350.119	253.021	321.924	298.781	255.251	298.467	216.95	308.359	323.005	391.408	277.503	345.1	259.75	292.155	360.331	331.597	265.415
Pantothenic acid (mg/d)	6.22916	4.54692	3.59855	5.04622	3.51146	4.83726	4.17449	4.74878	5.64969	5.02125	5.18424	4.59682	3.42892	5.59018	3.79811	4.61285	4.41707	3.7589	5.23545	5.4468	7.90395	5.84352	5.36652	6.77325	5.22346	3.09407	4.45344	4.88898	5.61739	6.71146	5.47183	4.71942	5.14836	5.41478	5.3256	5.68627	4.9183	6.11579	4.0515	5.2463	6.84595	8.00534	5.64749	6.06616	5.12958	5.71983	7.21339	6.34381	6.27397
Biotin (μg/d)	32.5169	24.385	20.4571	27.6536	14.7791	23.4193	20.7338	26.9029	29.0775	22.1303	30.5274	30.1946	14.1137	34.0509	18.6681	21.7881	23.9051	22.5838	23.9432	30.2842	38.5475	28.9372	30.232	47.6097	34.1577	14.2476	23.0153	26.5111	29.8164	42.1366	34.6249	21.7445	26.6368	34.4485	36.1962	33.9142	29.2371	43.6164	25.1619	27.0141	30.018	42.8125	32.4934	44.8978	26.8002	41.5103	37.7055	24.0634	33.1027
Vitamin C (mg/d)	88.6924	62.6821	186.788	150.389	74.6365	63.9158	58.99	90.6732	140.776	89.5589	110.575	56.4221	75.2768	142.99	100.862	120.569	166.992	42.7755	200.633	116.618	209.276	158.085	87.7146	110.518	157.439	69.5995	92.062	103.89	150.691	192.878	165.651	97.9792	156.135	75.7101	119.112	161.281	127.984	89.6452	94.5229	130.973	121.739	132.825	121.678	156.388	78.584	134.25	142.96	151.151	103.043
Saturated fatty acids (g/d)	23.359	17.7245	9.95743	20.2219	14.3518	14.3783	11.1513	15.1727	14.9409	17.2156	19.4309	13.3404	8.29686	11.4933	11.3376	16.5914	9.46358	15.2605	16.3357	16.0788	34.0861	18.7782	17.5393	22.7212	18.4481	7.54185	17.6208	14.2494	18.9309	17.1331	14.0349	18.3212	15.251	18.3873	20.7162	17.1586	15.6173	19.1242	15.186	18.9606	25.8005	28.1418	20.1781	20.4319	17.531	16.5704	27.8483	27.9223	24.1808
Monounsaturated fattyacids (g/d)	29.7811	21.1172	13.7738	22.6698	14.1151	15.9189	16.4782	14.8874	15.779	19.5625	23.1321	15.9521	8.48104	14.1185	12.8289	16.229	10.8377	14.1216	18.4323	20.5492	38.1565	19.7004	24.4295	24.5667	15.6089	12.9617	21.9058	12.5231	25.1309	20.4799	15.3353	22.3971	20.537	22.9869	24.0796	22.3689	17.8479	22.9859	13.836	20.3826	26.8897	38.5968	25.8008	23.4954	19.7874	16.5441	28.2719	22.2418	19.9167
Polyunsaturated faty acids (g/d)	15.2952	14.3914	8.42056	14.6457	7.21605	8.84038	8.09899	10.5901	10.559	11.5203	14.4989	11.0028	5.28073	11.3143	7.92405	9.1789	7.82001	8.19413	13.3272	12.2964	23.3623	11.4114	19.2682	17.6411	10.1709	9.56271	11.669	6.68618	16.0928	17.3251	11.0599	10.1563	15.47	17.047	20.0385	12.7147	10.818	12.7031	6.8084	10.7646	15.0541	21.5028	13.8159	16.7256	11.8655	9.68436	15.1701	13.597	9.96368
Cholesterol (μg/d)	359.029	200.936	83.9426	198.088	132.125	228.907	183.202	276.945	268.31	234.664	337.836	322.954	138.26	338.554	137.843	222.605	154.679	182.545	168.361	270.108	306.348	241.219	243.772	326.725	278.776	128.191	262.87	227.804	250.358	299.735	331.321	264.444	252.137	302.208	262.903	429.215	313.277	482.375	188.347	276.416	326.026	534.816	406.915	300.045	300.929	398.72	381.063	225.657	338.59
Soluble fiber (g/d)	2.91425	2.79963	3.43598	4.30793	2.84081	2.28015	2.65437	2.47369	3.65648	4.2793	3.81332	2.54285	2.61775	4.35934	3.42272	3.22337	4.03876	2.86093	4.75011	3.04764	6.56827	3.98524	3.80276	3.74108	4.21913	2.79219	2.9175	2.63922	3.69006	5.23425	4.04119	3.54037	3.98557	2.58642	3.9638	3.24496	3.33074	2.86858	2.71283	3.07919	4.071	4.38944	3.13119	4.44875	3.20656	4.02976	4.05083	4.68694	3.37345
Insoluble fiber (g/d)	8.20562	8.29289	11.5854	12.5	7.5832	6.80715	7.44752	8.09281	12.0405	10.8804	10.6631	8.08642	7.81607	14.1449	9.27693	9.21535	13.0011	6.34639	13.7242	10.4111	17.1403	12.2213	11.1332	12.9888	12.4214	7.40969	7.79519	8.19953	12.7556	15.3909	13.2897	9.44333	12.6928	9.39248	12.8229	10.2522	11.2343	8.64423	8.82476	10.1886	11.992	12.3715	9.78979	12.7496	9.52394	11.1123	12.5433	15.1801	10.1887
Total fiber (g/d)	11.5439	12.1173	15.1346	17.0205	10.4971	10.1132	10.3176	11.2735	16.337	15.3883	14.7615	11.3763	11.3858	22.5357	13.0542	12.7758	17.4739	9.58087	19.1272	14.1354	24.2243	16.3482	15.4988	17.8208	17.6538	11.1085	11.2791	11.3521	16.7664	21.5077	18.0086	13.0634	16.8172	12.9187	17.4194	14.5661	14.5864	11.8135	11.7568	13.6224	16.4877	17.1427	13.2759	17.4003	12.8897	15.4365	16.8793	20.4508	14.4078
NaCl (g/d)	12.2362	8.65434	6.10343	9.30484	6.94593	7.2091	11.4574	9.51661	11.2751	10.5234	9.18976	11.8269	8.93212	18.0917	9.7836	6.45653	5.43175	7.24165	9.98215	11.9686	15.1989	8.24118	13.5216	13.439	8.49335	11.5665	8.26857	10.6398	8.35822	17.1649	14.603	10.5761	7.94394	11.8648	10.9403	14.0093	6.33358	12.8838	7.25283	10.4882	11.4636	11.7184	9.91498	11.8809	10.141	6.82045	10.9728	12.9384	11.6092
Ethanol (g/d)	46.8558	7.32122	0.11424	0	0	35.1418	47.427	0.11424	0	17.5709	3.04273	0	0	0	11.8282	6.08545	0	0.22848	0.11424	0.2856	70.2837	1.69272	10.2497	3.27121	0	0	0.11424	29.6276	0.11424	61.7267	0	0.22848	0.11424	7.32122	9.01394	0.79968	0	53.3982	0.22848	3.15697	0	38.1846	0.11424	2.92849	18.1421	0.34272	3.04273	0	8.78546
Total Fat (g/d)	68.5584	53.3242	32.188	57.6792	35.808	39.2319	35.8109	40.7226	41.3722	48.447	57.1597	40.3771	22.1146	37.0191	32.1961	42.092	28.1864	37.6802	48.3137	48.9919	95.8932	49.9754	61.3511	65.0392	44.3794	30.1499	51.3342	33.5644	60.2749	55.0856	40.5475	51.0222	51.3832	58.5166	64.9053	52.3232	44.3648	54.9582	35.943	50.1959	67.8971	88.4336	59.9137	60.7973	49.2658	42.9337	71.4888	63.9143	54.1799
n-3 fatty acids (g/d)	2.9255	2.54866	1.26687	2.55227	1.12387	2.61147	1.56052	2.27588	2.0981	2.25722	2.23786	2.13791	1.19534	3.06761	1.34	1.56717	1.50479	1.32061	2.68469	2.53845	3.82523	2.29274	3.49378	3.16031	1.7752	2.29584	2.51872	1.27284	2.76036	3.58901	2.88189	1.56934	3.27667	3.12584	3.46314	2.77812	1.82618	2.83844	0.840875	2.50153	2.86802	4.16397	2.38418	3.25422	1.89069	1.43869	2.626	2.14168	1.86102
n-6 fatty acids (g/d)	12.3342	11.8206	7.13004	12.063	6.07609	6.18035	6.51613	8.2782	8.42386	9.22738	12.2307	8.83992	4.06227	8.1937	6.56082	7.58107	6.28442	6.85699	10.5992	9.72209	19.493	9.07618	15.7423	14.4426	8.36084	7.23506	9.11098	5.38935	13.2912	13.6842	8.11762	8.56496	12.149	13.8912	16.5395	9.88484	8.95701	9.81893	5.95291	8.21337	12.1425	17.2932	11.4041	13.4314	9.94853	8.22249	12.5076	11.4048	8.06374
Protein energy ratio (%)	13.7702	14.8753	13.1839	12.8445	11.3317	15.6447	11.1957	15.3389	14.2416	12.8321	14.1044	15.3159	12.4017	17.7132	13.1645	14.4506	13.3265	13.2343	11.4775	13.8513	8.44114	16.2808	13.3989	14.275	13.8878	14.7476	15.0413	11.9553	14.2707	12.6028	16.0973	13.4367	15.7112	13.7986	15.1284	15.6989	14.6082	13.5011	12.5818	18.3138	15.1806	12.9647	14.3451	15.094	13.591	13.4236	15.0186	13.0489	15.7222
Fat energy ratio (%)	29.6384	34.147	28.1329	33.6754	25.8421	23.088	19.8736	27.1254	24.475	24.7566	34.0109	27.7347	17.7123	23.3674	22.6739	28.6705	20.4733	26.1247	24.4055	27.0252	26.8404	30.2494	30.3636	28.5154	27.3858	25.6178	30.9435	20.2831	35.1277	21.347	24.6391	29.9383	31.4123	29.6947	33.851	30.0659	27.9911	23.881	25.8142	32.9196	31.6365	32.3426	33.4334	32.7463	27.6519	23.984	32.0907	27.1404	28.3437
Saturated fatty acids energy ratio (%)	8.83095	10.0596	7.73182	9.7776	9.00923	7.18223	5.36703	8.67424	7.41229	7.5629	10.1392	7.86134	5.62555	6.17011	6.91072	9.37242	5.84147	9.15263	7.07326	7.69638	8.40541	9.99006	7.69547	8.74128	7.62826	5.48603	9.27395	7.3775	9.52452	5.64128	7.11916	9.14122	7.7876	8.15513	9.31862	8.04448	8.43728	7.05909	9.4012	10.9252	10.3519	8.90357	9.70286	9.08218	8.3889	7.55669	10.7718	10.3423	11.0022
Carbohydrate energy ratio (%)	56.5914	50.9777	58.6832	53.4801	62.8261	61.2673	68.9307	57.5357	61.2834	62.4113	51.8847	56.9493	69.886	58.9194	64.1616	56.8788	66.2002	60.641	64.117	59.1235	64.7184	53.4698	56.2375	57.2096	58.7264	59.6346	54.0152	67.7616	50.6016	66.0502	59.2636	56.625	52.8765	56.5066	51.0207	54.2352	57.4007	62.6179	61.604	48.7666	53.1829	54.6927	52.2216	52.1597	58.7571	62.5924	52.8907	59.8107	55.9341
Alcohol energy ratio (%)	13.7775	3.23182	0	0	0	13.6531	17.5399	0	0	6.00368	1.18853	0	0	0	5.55344	2.57334	0	0	0	0	13.48	0.605874	3.49776	0.876277	0	0	0	11.7927	0	15.7493	0	0	0	2.52552	3.0737	0	0	15.1334	0	1.31244	0	9.36817	0	1.01246	6.53955	0	0.881026	0	3.10906
Cereals energy ratio (%)	24.516	34.6172	14.6289	23.8784	48.0022	34.5199	39.2249	39.8334	38.2078	39.9731	36.1842	47.8733	51.0961	34.6329	45.2552	30.5784	44.1235	42.3464	32.2709	38.7831	21.6755	29.5117	34.9848	34.2544	28.8901	50.2519	28.7829	38.1932	20.1131	25.1704	31.6085	35.0557	22.3992	43.3738	23.7973	33.6355	34.6231	28.7044	44.5353	28.5511	31.9839	24.8824	33.1791	22.5659	25.4297	37.9705	34.566	30.4776	37.082
Animal protein ratio (%)	64.6796	49.4004	43.9676	40.147	37.1145	65.1866	51.2879	55.5091	49.2157	48.4159	54.3595	52.8043	42.9373	53.8118	43.6289	52.773	37.4041	45.0769	40.1093	55.906	32.5471	57.8684	46.1792	48.7287	41.0403	51.5425	61.48	53.5379	52.6146	43.7964	55.4731	48.4607	45.7626	47.5812	40.7272	65.2761	48.5801	62.3667	42.0787	68.6859	56.8967	60.5511	58.5154	50.6738	50.7621	41.7556	56.7576	46.3848	57.5027
Green and yellow vegetables ratio (%)	30.1205	20	23.5294	28.6458	14.9254	23.5849	20.5479	21.7391	38.8471	10.3858	24.0506	29.4118	4.06504	8.44595	19.1083	38.0952	37.5	13.8122	34.8837	28.6396	10.1215	23.5988	18.7793	17.5879	55.5556	29.2398	32.2581	15	44.6097	10.7914	41.3534	15.0376	38.0835	30.8057	29.5775	35.9281	26.749	27.2109	28.3843	24.7312	19.2308	20.8333	22.0126	22.1239	14.5349	40.2299	32.5	15.9091	18.0328
[truncated: 7 more columns]
